# Supplementary material
Source: PubMed Central journal article supplement (PMC5662937)
Supplement: NIHMS567820-supplement-supplement_1.pdf [file NIHMS567820-supplement-supplement_1.pdf]

| Table E1a: Regression Analysis - Cognition |                   |                                 |                   |                                 |                   |                                 |                   |                                 |                   |                                 |
|--------------------------------------------|-------------------|---------------------------------|-------------------|---------------------------------|-------------------|---------------------------------|-------------------|---------------------------------|-------------------|---------------------------------|
|                                            | WPPSI             |                                 | WPPSI             |                                 | WPPSI             |                                 | WPPSI             |                                 | Visual-Motor      |                                 |
|                                            | Full Scale IQ     |                                 | Verbal IQ         |                                 | Performance IQ    |                                 | Processing Speed  |                                 | Integration       |                                 |
|                                            | Univariable       | Multivariable                   |
|                                            | ( <i>n</i> = 111) | ( <i>R</i> <sup>2</sup> = 0.30) | ( <i>n</i> = 112) | ( <i>R</i> <sup>2</sup> = 0.24) | ( <i>n</i> = 110) | ( <i>R</i> <sup>2</sup> = 0.20) | ( <i>n</i> = 102) | ( <i>R</i> <sup>2</sup> = 0.19) | ( <i>n</i> = 112) | ( <i>R</i> <sup>2</sup> = 0.21) |
| <b><i>Patient Characteristics</i></b>      |                   |                                 |                   |                                 |                   |                                 |                   |                                 |                   |                                 |
| <b>Race</b>                                | < 0.01 (-)        |                                 | < 0.01 (-)        |                                 | < 0.01 (-)        |                                 | < 0.01 (+)        |                                 |                   |                                 |
| Caucasian (reference)                      |                   |                                 |                   |                                 |                   |                                 |                   |                                 | 0.60              |                                 |
| Black                                      | < 0.01 (-)        |                                 | < 0.01 (-)        |                                 | < 0.01 (-)        |                                 | < 0.01 (-)        |                                 | 0.36              |                                 |
| Other                                      | 0.59              |                                 | 0.17              |                                 | 0.74              |                                 | 0.10              |                                 | 0.60              |                                 |
| <b>Gender</b>                              | 0.98              |                                 | 0.86              |                                 | 0.69              |                                 | 0.88              |                                 | 0.93              |                                 |
| <b>Larger Birth Weight</b>                 | <b>0.03 (+)</b>   |                                 | 0.24              |                                 | < 0.01 (+)        | <b>0.01 (+)</b>                 | < 0.01 (+)        |                                 | < 0.01 (+)        | < 0.01 (+)                      |
| <b>Larger Birth Head Circumference</b>     | 0.07              |                                 | 0.25              |                                 | <b>0.02 (+)</b>   |                                 | < 0.01 (+)        |                                 | < 0.01 (+)        |                                 |
| <b>Older Gestational Age</b>               | < 0.01 (+)        | <b>0.03 (+)</b>                 | 0.06              |                                 | < 0.01 (+)        |                                 | < 0.01 (+)        | < 0.01 (+)                      | < 0.01 (+)        |                                 |
| <b>Presence of Genetic Anomaly</b>         | < 0.01 (-)        |                                 | <b>0.01 (-)</b>   |                                 | < 0.01 (-)        |                                 | 0.17              |                                 | < 0.01 (-)        |                                 |

|                                                 |                 |  |                 |  |                      |  |      |  |                      |
|-------------------------------------------------|-----------------|--|-----------------|--|----------------------|--|------|--|----------------------|
| Normal (reference)                              |                 |  |                 |  |                      |  |      |  |                      |
| Suspected                                       | <b>0.01 (-)</b> |  | <b>0.03 (-)</b> |  | <b>&lt; 0.01 (-)</b> |  | 0.25 |  | <b>0.05 (-)</b>      |
| Confirmed                                       | <b>0.01 (-)</b> |  | <b>0.02 (-)</b> |  | <b>0.02 (-)</b>      |  | 0.11 |  | <b>&lt; 0.01 (-)</b> |
| <b>APOE Genotype</b>                            | 0.80            |  |                 |  |                      |  |      |  |                      |
| $\epsilon 3/\epsilon 3$ (reference)             |                 |  | 0.80            |  | 0.62                 |  | 0.62 |  | 0.40                 |
| $\epsilon 2/\epsilon 2$ $\epsilon 2/\epsilon 3$ | 0.74            |  | 0.92            |  | 0.48                 |  | 0.49 |  | 0.22                 |
| $\epsilon 3/\epsilon 4$ $\epsilon 4/\epsilon 4$ | 0.53            |  | 0.51            |  | 0.41                 |  | 0.41 |  | 0.39                 |
| <b>Greater Maternal Education</b>               |                 |  |                 |  |                      |  |      |  |                      |
| Less than High School<br>(reference)            | 0.09            |  | 0.36            |  | 0.09                 |  | 0.34 |  | <b>0.05 (+)</b>      |
| Finished high school/some<br>college            | 0.98            |  | 0.75            |  | 0.70                 |  | 0.54 |  | 0.57                 |
| Finished College                                | 0.76            |  | 0.75            |  | 0.96                 |  | 0.35 |  | 0.97                 |
| Graduate School                                 | 0.10            |  | 0.42            |  | 0.09                 |  | 0.12 |  | 0.08                 |
| <b>Higher Socioeconomic<br/>Status</b>          |                 |  |                 |  |                      |  |      |  |                      |
| Professional (reference)                        | 0.21            |  | 0.22            |  | 0.40                 |  | 0.55 |  | 0.78                 |

|                                                   |                 |                 |                 |                 |                 |  |                 |  |                 |                 |
|---------------------------------------------------|-----------------|-----------------|-----------------|-----------------|-----------------|--|-----------------|--|-----------------|-----------------|
| Skilled/clerical                                  | 0.99            |                 | 0.86            |                 | 0.98            |  | 0.15            |  | 0.64            |                 |
| Unskilled                                         | 0.86            |                 | 0.76            |                 | 0.76            |  | 0.31            |  | 0.48            |                 |
| Semi(-)skilled                                    | 0.23            |                 | 0.30            |                 | 0.40            |  | 0.25            |  | 0.95            |                 |
| <b>Presence of HLHS vs. Other SV</b>              | 0.18            |                 | 0.97            |                 | <b>0.02 (-)</b> |  | 0.81            |  | 0.82            |                 |
| <b>Use of Preoperative Mechanical Ventilation</b> | 0.37            |                 | 0.63            |                 | 0.28            |  | 0.71            |  | 0.16            |                 |
|                                                   |                 |                 |                 |                 |                 |  |                 |  |                 |                 |
| <b><i>First Operation</i></b>                     |                 |                 |                 |                 |                 |  |                 |  |                 |                 |
| <b>Older Age at First Surgery</b>                 | 0.47            |                 | 0.88            |                 | 0.23            |  | 0.38            |  | 0.70            |                 |
| <b>Larger Weight at First Surgery</b>             | 0.10            |                 | 0.38            |                 | <b>0.01 (+)</b> |  | <b>0.05 (+)</b> |  | <b>0.04 (+)</b> |                 |
| <b>Longer Duration CPB at First Operation</b>     | 0.08            |                 | 0.05 (-)        |                 | 0.44            |  | 0.54            |  | 0.39            |                 |
| <b>Longer Duration DHCA at First Operation</b>    | 0.10            |                 | 1.00            |                 | <b>0.01 (-)</b> |  | 0.16            |  | 0.52            |                 |
| <b>Higher Hematocrit after Hemodilution</b>       | <b>0.01 (+)</b> | <b>0.04 (+)</b> | <b>0.01 (+)</b> | <b>0.03 (+)</b> | <b>0.04 (+)</b> |  | 0.14            |  | <b>0.05 (+)</b> | <b>0.04 (+)</b> |

|                                                  |            |            |            |            |            |          |            |          |            |            |
|--------------------------------------------------|------------|------------|------------|------------|------------|----------|------------|----------|------------|------------|
| Longer Postoperative Length of Stay              | < 0.01 (-) | < 0.01 (-) | < 0.01 (-) | < 0.01 (-) | < 0.01 (-) | 0.01 (-) | < 0.01 (-) | 0.03 (-) | < 0.01 (-) | < 0.01 (-) |
| <b><i>Additional Operations</i></b>              |            |            |            |            |            |          |            |          |            |            |
| Greater Number of Additional Operations with CPB | 0.23       |            | 0.47       |            | 0.12       |          | 0.61       |          | 0.57       |            |
| Longer Duration Additional CPB                   | < 0.01 (-) | < 0.01 (-) | < 0.01 (-) | 0.02 (-)   | < 0.01 (-) | 0.01 (-) | 0.05       |          | 0.08       |            |
| Longer Duration Additional DHCA                  | 0.81       |            | 0.71       |            | 0.70       |          | 0.61       |          | 0.74       |            |

+ = better performance, - = worse performance

| Table E1b: Regression Analyses – Behavior and Social Skills |                      |                      |                      |                      |                      |                      |                      |               |
|-------------------------------------------------------------|----------------------|----------------------|----------------------|----------------------|----------------------|----------------------|----------------------|---------------|
|                                                             | Inattention          |                      | Impulsivity          |                      | Restricted Behavior  |                      | Social Skills        |               |
|                                                             | Univariable          | Multivariable        | Univariable          | Multivariable        | Univariable          | Multivariable        | Univariable          | Multivariable |
|                                                             | (n = 112)            | (n = 112)     |
| <b><u>Patient Characteristics</u></b>                       |                      |                      |                      |                      |                      |                      |                      |               |
| <b>Race</b>                                                 | <b>0.05 (+)</b>      |                      | <b>&lt; 0.01 (+)</b> |                      | 0.21                 |                      | 0.47                 |               |
| Caucasian (reference)                                       |                      |                      |                      |                      |                      |                      |                      |               |
| Black                                                       | <b>0.02 (-)</b>      |                      | <b>&lt; 0.01 (-)</b> |                      | 0.07                 |                      | 0.22                 |               |
| Other                                                       | 0.64                 |                      | 0.20                 |                      | 0.79                 |                      | 0.99                 |               |
| <b>Gender</b>                                               | 0.30                 |                      | 1.00                 |                      | <b>0.04 (+)</b>      | <b>0.03 (+)</b>      | 0.86                 |               |
| <b>Larger Birth Weight</b>                                  | <b>&lt; 0.01 (+)</b> |                      | <b>&lt; 0.01 (+)</b> |                      | <b>0.02 (+)</b>      |                      | 0.13                 |               |
| <b>Larger Birth Head Circumference</b>                      | <b>&lt; 0.01 (+)</b> | <b>&lt; 0.01 (+)</b> | <b>&lt; 0.01 (+)</b> | <b>&lt; 0.01 (+)</b> | 0.06                 |                      | 0.12                 |               |
| <b>Older Gestational Age</b>                                | <b>&lt; 0.01 (+)</b> |                      | <b>0.04 (+)</b>      |                      | <b>&lt; 0.01 (+)</b> | <b>0.02 (+)</b>      | 0.13                 |               |
| <b>Presence of Genetic Anomaly</b>                          | <b>&lt; 0.01 (-)</b> | <b>&lt; 0.01 (-)</b> | <b>&lt; 0.01 (-)</b> | <b>0.01 (-)</b>      | <b>&lt; 0.01 (-)</b> | <b>&lt; 0.01 (-)</b> | <b>&lt; 0.01 (-)</b> |               |



|                                                   |                      |                      |                      |                      |                 |                      |      |  |
|---------------------------------------------------|----------------------|----------------------|----------------------|----------------------|-----------------|----------------------|------|--|
| Skilled/clerical                                  | 0.25                 | <b>&lt; 0.01 (-)</b> | 0.81                 | 0.10                 | 0.29            |                      | 0.61 |  |
| Unskilled                                         | 0.40                 | <b>0.02 (-)</b>      | 0.12                 | 0.64                 | 0.58            |                      | 0.93 |  |
| Semi(-)skilled                                    | 0.34                 | 0.37                 | <b>&lt; 0.01 (+)</b> | <b>&lt; 0.01 (+)</b> | 0.42            |                      | 0.82 |  |
| <b>Presence of HLHS vs. Other SV</b>              | 0.50                 |                      | 0.68                 |                      | 0.86            |                      | 0.31 |  |
| <b>Use of Preoperative Mechanical Ventilation</b> | <b>&lt; 0.01 (-)</b> | <b>&lt; 0.01 (-)</b> | <b>&lt; 0.01 (-)</b> | <b>&lt; 0.01 (-)</b> | <b>0.01 (-)</b> | <b>0.02 (-)</b>      | 0.07 |  |
|                                                   |                      |                      |                      |                      |                 |                      |      |  |
| <b><i>First Operation</i></b>                     |                      |                      |                      |                      |                 |                      |      |  |
| <b>Older Age at First Surgery</b>                 | 0.20                 |                      | 0.44                 |                      | 0.56            |                      | 0.17 |  |
| <b>Larger Weight at First Surgery</b>             | 0.34                 |                      | 0.09                 |                      | 0.14            |                      | 0.42 |  |
| <b>Longer Duration CPB at First Operation</b>     | <b>0.02 (-)</b>      | <b>&lt; 0.01 (-)</b> | 0.75                 |                      | <b>0.02 (-)</b> | <b>&lt; 0.01 (-)</b> | 0.17 |  |
| <b>Longer Duration DHCA at First Operation</b>    | 0.90                 |                      | 0.43                 |                      | 0.49            |                      | 0.60 |  |
| <b>Higher Hematocrit after Hemodilution</b>       | <b>&lt; 0.01 (+)</b> |                      | <b>&lt; 0.01 (+)</b> |                      | <b>0.05 (+)</b> |                      | 0.10 |  |

|                                                  |            |  |          |  |            |  |          |  |
|--------------------------------------------------|------------|--|----------|--|------------|--|----------|--|
| Longer Postoperative Length of Stay              | < 0.01 (-) |  | 0.01 (-) |  | < 0.01 (-) |  | 0.01 (-) |  |
|                                                  |            |  |          |  |            |  |          |  |
| <b><u>Additional Operations</u></b>              |            |  |          |  |            |  |          |  |
| Greater Number of Additional Operations with CPB | 0.09       |  | 0.68     |  | 0.17       |  | 0.22     |  |
| Longer Duration Additional CPB                   | 0.34       |  | 0.47     |  | 0.19       |  | 0.85     |  |
| Longer Duration Additional DHCA                  | 0.10       |  | 0.07     |  | 0.22       |  | 0.26     |  |

**+ = better performance, - = worse performance**



| Table E1c: Regression Analyses – Academic Achievement |                 |               |                 |               |
|-------------------------------------------------------|-----------------|---------------|-----------------|---------------|
|                                                       | Mathematics     |               | Reading         |               |
|                                                       | Univariable     | Multivariable | Univariable     | Multivariable |
|                                                       | (n = 109)       | (n = 106)     | (n = 107)       | (n = 102)     |
| <b><u>Patient Characteristics</u></b>                 |                 |               |                 |               |
| <b>Race</b>                                           | < 0.01 (-)      | < 0.01 (-)    | <0.01 (+)       | <0.01 (+)     |
| Caucasian (reference)                                 |                 |               |                 |               |
| Black                                                 | < 0.01 (-)      | < 0.01 (-)    | < 0.01 (-)      | < 0.01(-)     |
| Other                                                 | 0.25            | 0.61          | 0.50            | 0.56          |
| <b>Gender</b>                                         | 0.41            |               | 0.97            |               |
| <b>Larger Birth Weight</b>                            | <b>0.01 (+)</b> |               | 0.81            |               |
| <b>Larger Birth Head Circumference</b>                | 0.07            |               | 0.98            |               |
| <b>Older Gestational Age</b>                          | <b>0.01 (+)</b> |               | 0.31            |               |
| <b>Presence of Genetic Anomaly</b>                    | <b>0.02 (-)</b> |               | <b>0.05 (+)</b> |               |
| Normal (reference)                                    |                 |               |                 |               |
| Suspected                                             | 0.13            |               | <b>0.02 (+)</b> |               |
| Confirmed                                             | 0.01 (-)        |               | 0.27            |               |

|                                                   |                 |  |                      |                      |
|---------------------------------------------------|-----------------|--|----------------------|----------------------|
| <b>APOE Genotype</b>                              |                 |  |                      |                      |
| ε3/ε3 (reference)                                 | 0.59            |  | 0.61                 |                      |
| ε2/ε2 ε2/ε3                                       | 0.97            |  | 0.91                 |                      |
| ε3/ε4 ε4/ε4                                       | 0.31            |  | 0.32                 |                      |
| <b>Greater Maternal Education</b>                 | <b>0.03 (+)</b> |  | <b>&lt; 0.01 (-)</b> | <b>&lt; 0.01 (-)</b> |
| Less than High School (reference)                 |                 |  |                      |                      |
| Finished high school/some college                 | 0.30            |  | 0.11                 | 0.26                 |
| Finished College                                  | 0.19            |  | <b>0.04 (-)</b>      | 0.24                 |
| Graduate School                                   | <b>0.01 (+)</b> |  | <b>&lt; 0.01(-)</b>  | <b>&lt; 0.01 (-)</b> |
| <b>Lower Socioeconomic Status</b>                 |                 |  |                      |                      |
| Professional (reference)                          | 0.23            |  | <b>0.04 (NS)</b>     |                      |
| Skilled/clerical                                  | 0.69            |  | 0.85                 |                      |
| Unskilled                                         | 0.41            |  | 0.30                 |                      |
| Semi(-)skilled                                    | 0.10            |  | 0.07                 |                      |
| <b>Presence of HLHS vs. Other SV</b>              | 0.94            |  | 0.79                 |                      |
| <b>Use of Preoperative Mechanical Ventilation</b> | 0.39            |  | 0.54                 |                      |
|                                                   |                 |  |                      |                      |

|                                                  |                      |                      |                 |  |
|--------------------------------------------------|----------------------|----------------------|-----------------|--|
| <b><u>First Operation</u></b>                    |                      |                      |                 |  |
| Older Age at First Surgery                       | 0.40                 |                      | 0.80            |  |
| Larger Weight at First Surgery                   | <b>0.02 (+)</b>      |                      | 0.48            |  |
| Longer Duration CPB at First Operation           | 0.34                 |                      | 0.33            |  |
| Longer Duration DHCA at First Operation          | 0.64                 |                      | 0.44            |  |
| Higher Hematocrit after Hemodilution             | 0.14                 |                      | 0.24            |  |
| Longer Postoperative Length of Stay              | <b>&lt; 0.01 (-)</b> | <b>&lt; 0.01 (-)</b> | 0.11            |  |
|                                                  |                      |                      |                 |  |
| <b><u>Additional Operations</u></b>              |                      |                      |                 |  |
| Greater Number of Additional Operations with CPB | 0.38                 |                      | 0.36            |  |
| Longer Duration Additional CPB                   | <b>0.02 (-)</b>      | <b>0.03 (-)</b>      | <b>0.05 (+)</b> |  |
| Longer Duration Additional DHCA                  | 0.24                 |                      | 0.47            |  |

**+ = better performance, - = worse performance**
